# Supplementary material for: Potential of temperature- and salinity-driven shifts in diatom compatible solute concentrations to impact biogeochemical cycling within sea ice
Source: Oxford University Press journal article supplement (doi:10.1525/elementa.421), 2020-01-01
Supplement: elementa-8-421-s1.xlsx [file elementa-8-421-s1.xlsx]

## Sheet: Supplemental Material
Supplemental Material
Potential of temperature and salinity-driven shifts in diatom compatible solute concentrations to impact biogeochemical cycling within sea ice.
Hannah M. Dawson1*, Angela Boysen1, Katherine, R. Heal1, Laura T. Carlson1, Anitra E. Ingalls1, Jodi N. Young1
1School of Oceanography, Box 357940, University of Washington, Seattle, WA, 98195, USA
*Corresponding author, hmdawson@uw.edu
2020-04-20
List of Contents:
Figure S1. Correlation between cell counts and relative fluorescence units (RFU). Biomass density of Nitzschia lecointei cultures grown at a) salinity 32 and –1°C, b) salinity 32 and 4°C, c) salinity 41 and –1°C, and d) salinity 41 and 4°C as measured by (RFU) and cell density (cells mL–1). Values are individual measures of individual tubes (no error). Linear regression statistics shown on plot.
Figure S2. Cell size of Nitzschia lecointei cultures during exponential growth, estimated as cell diameter (µm) by Coulter Counter. Blue indicates –1°C; orange indicates 4°C. Error bars represent SD (n = 3). Detailed statistics of two-factor ANOVA are provided in Table S2.
Table S1. Internal standard suite used in B-MIS normalization. Bolded standards were used for absolute quantification of compounds for comparison between field and culture samples as the non-labeled compounds were detected in both sample types.
Table S2. Full two-factor ANOVA statistics from general cell physiology measures from Nitzschia lecointei culture study. Average and standard deviation per treatment for each measure also listed.
Table S3. Full results from targeted metabolomics analysis of Nitzschia lecointei, including univariate statistics for comparisons between treatments, with p-value, q-value with false discovery rate correction (Benjamini and Hochberg, 1995), log2 fold change (FC), sample average peak areas, and reported significance (T/F). Reported peak areas per replicate are adjusted via B-MIS normalization (Bo…
Table S4. Full comparison of compounds detected in field and culture samples from targeted metabolomics analysis of Nitzschia lecointei grown at –1°C and salinity 32 and samples of bottom sea ice from Utqiaġvik, AK.
Table S5. Full two-factor ANOVA statistics from compatible solute (proline, GBT, DMSP and DHPS) relative abundances (normalized peak area per RFU) from Nitzschia lecointei cultures.
Table S6. Calculation of potential compatible solute-based organic nitrogen release into the sea-ice environment.

## Sheet: Figure S1
Figure S1. Correlation between cell counts and relative fluorescence units (RFU). Biomass density of Nitzschia lecointei cultures grown at a) salinity 32 and –1°C, b) salinity 32 and 4°C, c) salinity 41 and –1°C, and d) salinity 41 and 4°C as measured by (RFU) and cell density (cells mL–1). Values are individual measures of individual tubes (no error). Linear regression statistics shown on plot.

## Sheet: Figure S2
Figure S2. Cell size of Nitzschia lecointei cultures during exponential growth, estimated as cell diameter (µm) by Coulter Counter. Blue indicates –1°C; orange indicates 4°C. Error bars represent SD (n = 3). Detailed statistics of two-factor ANOVA are provided in Table S2.

## Sheet: Table S1
Internal Standard
Acetyl CoA, 13C2
Adenosine Monophosphate, 15N5
Alpha-Tocopherol, D6
Arachidonic Acid, D8
DL-Alanine, D3
DL-Histidine, 15N
DL-Proline, D7
DL-Valine, D8
Docosahexaenoic Acid (DHA), D5
Eicosapentaenoic Acid (EPA), D5
Guanosine Monophosphate, 15N5
Indole 3 Acetic Acid, D5
Isethionic Acid, 13C2
L-Cysteic Acid, D3
L-Isoleucine, 15N
L-Methionine, D3
L-Phenylalanine, D8
L-Tryptophan, D3
Pyridoxal, D3
Riboflavin-dioxopyrimidine (Vitamin B2), 13C4, 15N2
Succinic Acid, D4
Sulfoacetic Acid, 13C2
Sulfolactic Acid, 13C3
Taurine, D4
Thiamine Hydrochloride, 13C3
Tryptamine Hydrochloride, D4

## Sheet: Table S2
Physiological parameter	32ppt-1C_ave	32ppt-1C_stdev	32ppt4C_ave	32ppt4C_stdev	41ppt-1C_ave	41ppt-1C_stdev	41ppt4C_ave	41ppt4C_stdev	Interaction effect F statistic (1, 8)	Interaction effect p value	Significant interaction (pval)	Temperature effect F statistic (1, 8)	Temperature effect p value	Significant temperature effect (pval)	Higher in:	Salinity effect F statistic (1, 8)	Salinity effect p value	Significant salinity effect (pval)	Higher in:		Specific significant pair comparisons (Tukey HSD)	p value	Sig?	Higher in:	Specific significant pair comparisons (Tukey HSD)	p value	Sig?	Higher in:
Growth rate	0.2036	0.00684324	0.217533	0.0184177	0.183567	0.00402036	0.200367	0.0078373	0.053	0.8234	FALSE	6.112	0.0386	TRUE	4C	8.954	0.0173	TRUE	32 ppt
Photosynthetic efficiency	0.583333	0.0152753	0.565	0.00707107	0.606667	0.0057735	0.556667	0.011547	5.505	0.05136	FALSE	28.698	0.00106	TRUE	-1C	0.721	0.42384	FALSE	NA
Molar carbon per cell	3.5037	0.37969	4.0778	0.461263	2.60016	0.243718	3.80083	0.145356	3.629	0.081028	FALSE	28.968	0.000165	TRUE	4C	12.731	0.003867	TRUE	32 ppt
Molar C:N	8.57	0.210555	8.79	0.318224	8.07	0.0860233	9.07	0.0648074	15.481	0.00198	TRUE	NA	NA	NA	NA	NA	NA	NA	NA		41 ppt 4C vs 41 ppt -1C	6.11e-05	TRUE	4C	41 ppt -1C vs 32 ppt -1C	0.0176046	TRUE	32 ppt
Molar nitrogen per cell	0.408666	0.0413974	0.465631	0.0683693	0.322148	0.0300672	0.419118	0.0176877	0.842	0.37696	FALSE	12.463	0.00414	TRUE	4C	9.308	0.01007	TRUE	32 ppt
Cell diameter	6.64116	0.0172377	7.25933	0.0358019	6.56992	0.0292856	7.20056	0.0138618	0.177	0.68486	FALSE	1779.82	1.1x10^-10	TRUE	4C	19.292	0.00231	TRUE	32 ppt

## Sheet: Table S3
	B-MIS normalized peak areas per RFU in each replicate														log2 scaled fold change values for all comparisons			Signifcance for all comparisons are based on q-values
Compound Name	32ppt-1C_A	32ppt-1C_B	32ppt-1C_C	32ppt4C_A	32ppt4C_B	32ppt4C_C	41ppt-1C_A	41ppt-1C_B	41ppt-1C_C	41ppt4C_A	41ppt4C_B	41ppt4C_C	4Cv1C_pvalue	4Cv1C_qvalue	4Cv1C_FC	1C_ave	4C_ave	TempSig	AveSmp	41pptv32ppt_pvalue	41pptv32ppt_qvalue	41pptv32ppt_FC	41ppt_ave	32ppt_ave	SalinitySig	4Cv1C32ppt_pvalue	4Cv1C32ppt_qvalue	4Cv1C32ppt_FC	1C32ppt_ave	4C32ppt_ave	Temp32pptSig	4Cv1C41ppt_pvalue	4Cv1C41ppt_qvalue	4Cv1C41ppt_FC	1C41ppt_ave	4C41ppt_ave	Temp41pptSig	41pptv32ppt4C_pvalue	41pptv32ppt4C_qvalue	41pptv32ppt4C_FC	41ppt4C_ave	32ppt4C_ave	Salinity4CSig	41pptv32ppt1C_pvalue	41pptv32ppt1C_qvalue	41pptv32ppt1C_FC	41ppt1C_ave	32ppt1C_ave	Salinity1CSig
Aconitic Acid	1263.21	1330.52	1525.38	6681.11	6474.16	7927.19	1285.26	1886.37	1340.1	6133.62	5163.46	5108.24	6.1416e-05	0.00101747	-2.11885	1438.47	6247.96	TRUE	3843.22	0.659482	0.921608	-0.268833	3486.18	4200.26	FALSE	0.00526411	0.0220591	-2.35564	1373.03	7027.49	TRUE	0.0014671	0.0430349	-1.86241	1503.91	5468.44	TRUE	0.0554387	0.204874	-0.361879	5468.44	7027.49	FALSE	0.578085	0.737267	0.131352	1503.91	1373.03	FALSE
Adenine	656.224	842.819	895.875	1613.08	1640.42	1623.83	517.299	969.469	715.076	2745.89	1878.16	1981.24	0.000719562	0.00394824	-1.32076	766.127	1913.77	TRUE	1339.95	0.543036	0.868857	0.27627	1467.85	1212.04	FALSE	0.00708573	0.0239825	-1.02612	798.306	1625.78	TRUE	0.0186474	0.0783893	-1.58491	733.948	2201.76	FALSE	0.169884	0.347671	0.437528	2201.76	1625.78	FALSE	0.695168	0.815664	-0.121264	733.948	798.306	FALSE
Adenosyl Homocysteine	19895.2	20454.8	21312.7	31987.3	28839.9	36229.4	18735	25427.8	23606.9	57740	42362.4	36937.5	0.00784153	0.0202451	-0.854904	21572.1	39016.1	TRUE	30294.1	0.279692	0.850119	0.367805	34134.9	26453.2	FALSE	0.0277466	0.0626078	-0.654426	20554.3	32352.2	FALSE	0.0544752	0.118687	-1.01588	22589.9	45680	FALSE	0.155761	0.337478	0.497698	45680	32352.2	FALSE	0.416337	0.59093	0.13624	22589.9	20554.3	FALSE
Adenosyl Methionine	542050	516210	535945	783739	781693	663898	286338	465542	461246	1.37847e+06	1.0736e+06	1.43281e+06	0.00805202	0.0202451	-1.12297	467888	1.01904e+06	TRUE	743462	0.36004	0.850119	0.415027	849668	637256	FALSE	0.0293723	0.064619	-0.483775	531401	743110	FALSE	0.00565809	0.0592711	-1.67914	404376	1.29496e+06	FALSE	0.0278165	0.188296	0.80126	1.29496e+06	743110	FALSE	0.162206	0.331956	-0.394106	404376	531401	FALSE
ADP	9076.56	9174.03	11458.3	4501.29	4005.13	4133.59	4626.08	6930	5849.63	5410.37	3959.61	5280.8	0.0221927	0.0398562	0.787761	7852.44	4548.46	TRUE	6200.45	0.261824	0.850119	-0.401709	5342.75	7058.15	FALSE	0.015528	0.0403933	1.2329	9902.97	4213.34	TRUE	0.327772	0.412056	0.248583	5801.9	4883.59	FALSE	0.282579	0.469188	0.21298	4883.59	4213.34	FALSE	0.0168318	0.134125	-0.771336	5801.9	9902.97	FALSE
Alanine	58424.2	57571.9	66974.8	33549.3	32969.2	36444.2	46481	61719.8	49849.6	46791.9	36999.6	33716.9	0.000477446	0.00394824	0.629272	56836.9	36745.2	TRUE	46791	0.81957	0.928428	-0.0533197	45926.5	47655.6	FALSE	0.00683342	0.0239825	0.829494	60990.3	34320.9	TRUE	0.0915425	0.157956	0.42762	52683.5	39169.5	FALSE	0.342156	0.510335	0.190644	39169.5	34320.9	FALSE	0.217579	0.382679	-0.21123	52683.5	60990.3	FALSE
Aminobenzoic Acid	222.199	195.209	245.047	166.85	175.546	139.774	87.5029	204.418	154.088	311.538	943.462	300.221	0.272002	0.341149	-0.878162	184.744	339.565	FALSE	262.155	0.313482	0.850119	0.806011	333.538	190.771	FALSE	0.0323553	0.0690821	0.45828	220.818	160.723	FALSE	0.2219	0.316609	-1.80198	148.67	518.407	FALSE	0.234216	0.42491	1.6895	518.407	160.723	FALSE	0.15482	0.330596	-0.570752	148.67	220.818	FALSE
Aminobutyric Acid	453.468	471.943	739.811	1057.15	1161.47	1213.72	811.915	919.017	684.07	2284.73	801.161	1452.29	0.0257834	0.044489	-0.966025	680.037	1328.42	TRUE	1004.23	0.31315	0.850119	0.447864	1158.86	849.594	FALSE	0.0113857	0.0333982	-1.04348	555.074	1144.11	TRUE	0.239139	0.323757	-0.910088	805	1512.72	FALSE	0.481469	0.635978	0.402918	1512.72	1144.11	FALSE	0.10112	0.269671	0.53631	805	555.074	FALSE
AMP	15647.3	16508.2	14784.2	6556.05	6786.44	8962.66	12664	12547.9	12096.3	8473.95	6278.09	6152.73	4.3481e-05	0.000956581	0.963277	14041.3	7201.65	TRUE	10621.5	0.439366	0.850119	-0.250367	9702.16	11540.8	FALSE	0.00167768	0.012303	1.07343	15646.6	7435.05	TRUE	0.0147629	0.0683756	0.835659	12436.1	6968.26	FALSE	0.686563	0.774991	-0.0935444	6968.26	7435.05	FALSE	0.0150995	0.134125	-0.331317	12436.1	15646.6	FALSE
Arginine	3.00174e+06	3.354e+06	3.47364e+06	2.04711e+06	1.69851e+06	2.57309e+06	2.33545e+06	3.50045e+06	3.08785e+06	2.42159e+06	2.3555e+06	2.25011e+06	0.00260333	0.00916374	0.490735	3.12552e+06	2.22432e+06	TRUE	2.67492e+06	0.929142	0.939821	-0.0177216	2.65849e+06	2.69135e+06	FALSE	0.0254577	0.0589547	0.63747	3.27646e+06	2.10624e+06	FALSE	0.20285	0.307534	0.344702	2.97458e+06	2.3424e+06	FALSE	0.452213	0.612227	0.153319	2.3424e+06	2.10624e+06	FALSE	0.480216	0.660297	-0.13945	2.97458e+06	3.27646e+06	FALSE
Argininosuccinic Acid	4988.75	5481.11	5487.08	32360.2	31963.6	36895.5	5724.98	7470.98	8090.69	85656.2	57118	58665	0.00353658	0.0107317	-3.02263	6207.26	50443.1	TRUE	28325.2	0.292188	0.850119	0.926589	37121	19529.4	FALSE	0.00282914	0.0155603	-2.66523	5318.98	33739.8	TRUE	0.0224555	0.0859169	-3.24232	7095.55	67146.4	FALSE	0.0651871	0.204874	0.99286	67146.4	33739.8	FALSE	0.122292	0.298937	0.415764	7095.55	5318.98	FALSE
Asparagine	14981.2	18456.8	20651.6	30308.6	29923	25687.3	17852.2	20476.9	15642.2	70341.6	57160.5	74424.5	0.0203487	0.0373059	-1.41345	18010.1	47974.2	TRUE	32992.2	0.150622	0.850119	0.870055	42649.6	23334.7	FALSE	0.00900131	0.0273143	-0.667624	18029.9	28639.6	TRUE	0.00756707	0.0592711	-1.90357	17990.4	67308.9	FALSE	0.0125654	0.157965	1.23278	67308.9	28639.6	FALSE	0.986352	0.995152	-0.00315818	17990.4	18029.9	FALSE
Aspartic acid	110664	120854	127909	39594.9	40345.1	43260.2	68361.3	103558	79630.6	52270.2	42914.5	43066.5	0.00144643	0.00606124	1.22458	101830	43575.2	TRUE	72702.4	0.467459	0.850119	-0.308171	64966.9	80437.9	FALSE	0.00280071	0.0155603	1.5447	119809	41066.7	TRUE	0.0577874	0.118687	0.863555	83850.1	46083.7	FALSE	0.241426	0.42491	0.166288	46083.7	41066.7	FALSE	0.0553077	0.212213	-0.514853	83850.1	119809	FALSE
Betaine	5.63663e+07	5.74711e+07	6.23898e+07	5.2668e+07	4.20339e+07	4.62367e+07	5.87872e+07	8.1984e+07	6.98429e+07	1.06876e+08	8.85225e+07	8.51934e+07	0.63628	0.699908	-0.123896	6.44735e+07	7.02551e+07	FALSE	6.73643e+07	0.0057358	0.155518	0.631091	8.18677e+07	5.2861e+07	FALSE	0.0415072	0.0811696	0.32237	5.87424e+07	4.69795e+07	FALSE	0.0701161	0.134294	-0.413872	7.02047e+07	9.35307e+07	FALSE	0.0099313	0.157965	0.993407	9.35307e+07	4.69795e+07	FALSE	0.224287	0.382679	0.257165	7.02047e+07	5.87424e+07	FALSE
Carnitine	223469	229274	282496	351820	316292	367787	133070	195233	147966	428658	337401	399906	0.000222237	0.00244461	-0.861922	201918	366977	TRUE	284448	0.726262	0.928428	-0.109016	273706	295190	FALSE	0.0156065	0.0403933	-0.4946	245079	345300	TRUE	0.00330916	0.0497075	-1.29167	158756	388655	TRUE	0.251347	0.433696	0.170641	388655	345300	FALSE	0.0312701	0.163041	-0.626434	158756	245079	FALSE
Carotene	733.646	67.852	116.182	89.0285	158.007	1237.3	1185.17	1696.03	430.099	217.066	215.578	157.97	0.28652	0.350191	1.02723	704.83	345.825	FALSE	525.328	0.463422	0.850119	0.699935	650.319	400.336	FALSE	0.687907	0.703905	-0.693755	305.893	494.779	FALSE	0.1321	0.215274	2.48711	1103.77	196.871	FALSE	0.507157	0.652636	-1.32953	196.871	494.779	FALSE	0.151249	0.330596	1.85133	1103.77	305.893	FALSE
Choline	4.95232e+06	6.25794e+06	5.55698e+06	2.13142e+06	1.91713e+06	2.48964e+06	4.08798e+06	5.24816e+06	3.73405e+06	3.73611e+06	2.6016e+06	2.76023e+06	0.000671988	0.00394824	0.932239	4.9729e+06	2.60602e+06	TRUE	3.78946e+06	0.834838	0.928428	-0.0721793	3.69469e+06	3.88424e+06	FALSE	0.0050567	0.0220591	1.35868	5.58908e+06	2.1794e+06	TRUE	0.0881498	0.155144	0.522667	4.35673e+06	3.03265e+06	FALSE	0.122622	0.301697	0.476649	3.03265e+06	2.1794e+06	FALSE	0.108671	0.273229	-0.359366	4.35673e+06	5.58908e+06	FALSE
Citric Acid	116701	123485	139497	154071	148818	143975	119619	194109	181243	340577	290673	289005	0.0748157	0.10973	-0.644354	145776	227853	FALSE	186814	0.0343857	0.432277	0.775863	235871	137758	FALSE	0.0632933	0.103145	-0.235041	126561	148955	FALSE	0.00952951	0.0592711	-0.894689	164990	306752	FALSE	0.00966027	0.157965	1.0422	306752	148955	FALSE	0.231641	0.384612	0.382549	164990	126561	FALSE
Citrulline	58898.3	45804.6	70840.3	116320	108580	75224.8	37511.7	47538.7	50843.8	184704	125726	121466	0.00368477	0.0108086	-1.23294	51906.2	122003	TRUE	86954.8	0.580021	0.895472	0.255402	94631.7	79278	FALSE	0.060251	0.101963	-0.773737	58514.4	100042	FALSE	0.0359911	0.0994775	-1.6682	45298.1	143965	FALSE	0.155226	0.337478	0.52512	143965	100042	FALSE	0.204597	0.36744	-0.369343	45298.1	58514.4	FALSE
Coenzyme B12	187.922	193.85	266.591	34.3299	70.0357	70.6575	125.705	249.815	122.268	158.199	86.6661	141.975	0.0117212	0.0245586	1.02851	191.025	93.6439	TRUE	142.334	0.8213	0.928428	0.1035	147.438	137.231	FALSE	0.0125798	0.0357104	1.88926	216.121	58.3411	TRUE	0.490679	0.563055	0.363793	165.929	128.947	FALSE	0.06199	0.204874	1.14419	128.947	58.3411	FALSE	0.375022	0.550033	-0.381273	165.929	216.121	FALSE
Cyano B12	4458.01	5560.69	6769.71	2622	2176.58	1614.13	2973.91	3947.96	3194.76	3425.82	3661.97	3365.66	0.0400695	0.0652985	0.673745	4484.17	2811.03	FALSE	3647.6	0.627129	0.921608	-0.173646	3428.35	3866.85	FALSE	0.0217555	0.0546995	1.38846	5596.14	2137.57	FALSE	0.745755	0.79068	-0.0472514	3372.21	3484.48	FALSE	0.0343971	0.204874	0.704976	3484.48	2137.57	FALSE	0.0621177	0.227765	-0.730737	3372.21	5596.14	FALSE
Cysteic Acid	4832.25	5722.6	5176.3	3434.96	2329.6	4298.38	2741.27	2677.12	2465.48	3088.84	2576.39	2437.28	0.215794	0.275216	0.378507	3935.84	3027.58	FALSE	3481.71	0.0225612	0.342486	-0.690197	2664.4	4299.02	FALSE	0.0622446	0.103145	0.644572	5243.72	3354.31	FALSE	0.759285	0.795442	-0.0394652	2627.96	2700.84	FALSE	0.372752	0.537741	-0.312611	2700.84	3354.31	FALSE	0.00561797	0.0988762	-0.996648	2627.96	5243.72	FALSE
Cystine	766.965	469.042	524.497	311.647	586.979	230.123	286.628	497.411	597.829	1357.66	698.473	1166.66	0.342904	0.407778	-0.469671	523.728	725.256	FALSE	624.492	0.166476	0.850119	0.672396	767.442	481.542	FALSE	0.212787	0.27012	0.641265	586.835	376.249	FALSE	0.0701993	0.134294	-1.22169	460.622	1074.26	FALSE	0.0498585	0.204874	1.51358	1074.26	376.249	FALSE	0.385024	0.555444	-0.34937	460.622	586.835	FALSE
DHPS	2.58745e+07	2.54894e+07	2.65125e+07	1.48879e+07	1.25099e+07	1.57356e+07	2.05897e+07	2.88315e+07	2.42347e+07	2.4751e+07	2.15766e+07	2.04235e+07	0.0135219	0.0264428	0.463639	2.52554e+07	1.83141e+07	TRUE	2.17847e+07	0.306233	0.850119	0.214492	2.34012e+07	2.01683e+07	FALSE	0.00389372	0.0193781	0.852384	2.59588e+07	1.43778e+07	TRUE	0.457002	0.543462	0.142011	2.4552e+07	2.22504e+07	FALSE	0.0099505	0.157965	0.629989	2.22504e+07	1.43778e+07	FALSE	0.615934	0.758835	-0.0803849	2.4552e+07	2.59588e+07	FALSE
Dimethyl Glycine	179826	172733	219498	203840	182475	240654	245630	298975	244507	419580	319222	353681	0.200236	0.259129	-0.337102	226862	286575	FALSE	256718	0.00706899	0.155518	0.650094	313599	199838	FALSE	0.460191	0.49996	-0.132232	190686	208989	FALSE	0.0539929	0.118687	-0.469309	263037	364161	FALSE	0.0171286	0.16748	0.801147	364161	208989	FALSE	0.0373242	0.163041	0.464071	263037	190686	FALSE
DMSP	8.42988e+07	8.87538e+07	9.19018e+07	5.34195e+07	4.31575e+07	5.01601e+07	7.78443e+07	107686663	9.40067e+07	1.06265e+08	85811727	85883007	0.118698	0.1658	0.358476	9.07487e+07	7.07829e+07	FALSE	8.07658e+07	0.0457787	0.491159	0.437402	9.29163e+07	6.86152e+07	FALSE	0.000728068	0.00890434	0.85251	8.83181e+07	4.89124e+07	TRUE	0.964239	0.964239	0.0081646	9.31792e+07	9.26534e+07	FALSE	0.0123672	0.157965	0.921644	9.26534e+07	4.89124e+07	FALSE	0.634169	0.764478	0.0772986	9.31792e+07	8.83181e+07	FALSE
FAD	1372.31	1233.7	1456.83	566.738	803.356	841.74	1283.29	1116.08	1060.19	1178.36	1062.01	728.983	0.00645108	0.0172029	0.537911	1253.73	863.531	TRUE	1058.63	0.880275	0.928428	0.0350314	1071.48	1045.78	FALSE	0.00571977	0.0228791	0.877247	1354.28	737.278	TRUE	0.358438	0.444261	0.220438	1153.18	989.784	FALSE	0.201497	0.394038	0.424905	989.784	737.278	FALSE	0.0976931	0.269671	-0.231904	1153.18	1354.28	FALSE
Fructose 6 phosphate	6760.89	7952.98	7254.25	2899.31	2683.41	2946.43	4891.95	6252.39	5757.19	3762.67	3612.47	3597.6	0.000337089	0.00329598	0.99503	6478.27	3250.31	TRUE	4864.29	0.707908	0.928428	-0.129746	4645.71	5082.88	FALSE	0.00414872	0.0193781	1.36494	7322.71	2843.05	TRUE	0.0361736	0.0994775	0.62323	5633.84	3657.58	FALSE	0.00205576	0.157965	0.36345	3657.58	2843.05	FALSE	0.0336323	0.163041	-0.378258	5633.84	7322.71	FALSE
Fumaric Acid	1078.48	632.072	847.662	906.316	948.209	987.693	851.047	927.398	807.008	1857.75	1506.93	1296.15	0.0521887	0.0820108	-0.544681	857.277	1250.51	FALSE	1053.89	0.141111	0.850119	0.424167	1207.71	900.071	FALSE	0.540904	0.566661	-0.151883	852.736	947.406	FALSE	0.0463118	0.116441	-0.85017	861.818	1553.61	FALSE	0.0631091	0.204874	0.713569	1553.61	947.406	FALSE	0.951274	0.988872	0.0152827	861.818	852.736	FALSE
Glucose 6 phosphate	8133.4	4908.89	5793.2	2361.57	2176.58	4102.7	5969.65	6183.64	4116.6	4754.72	2342.24	2763.55	0.0032256	0.0101376	0.924061	5850.9	3083.56	TRUE	4467.23	0.846197	0.928428	-0.0724604	4355.07	4579.39	FALSE	0.0501751	0.0905087	1.12421	6278.5	2880.28	FALSE	0.0986533	0.166952	0.722471	5423.3	3286.84	FALSE	0.695731	0.774991	0.190489	3286.84	2880.28	FALSE	0.508476	0.667849	-0.211249	5423.3	6278.5	FALSE
Glucosylglycerol	10929.7	9829.01	9393.42	4746.11	4445.4	3237.11	10698.3	15173.2	11372.3	6210.76	4914.98	5689.53	0.000211846	0.00244461	1.20452	11232.6	4873.98	TRUE	8053.32	0.3924	0.850119	0.344335	9009.84	7096.79	FALSE	0.000809486	0.00890434	1.27859	10050.7	4142.87	TRUE	0.0321401	0.0994775	1.14723	12414.6	5605.09	FALSE	0.0724904	0.212638	0.436107	5605.09	4142.87	FALSE	0.226128	0.382679	0.30474	12414.6	10050.7	FALSE
Glutamic acid	1.4374e+06	1.42659e+06	1.58134e+06	631603	635460	804832	929326	1.22363e+06	988213	790645	687145	644907	0.00249415	0.00916374	0.854902	1.26441e+06	699099	TRUE	981757	0.330918	0.850119	-0.308133	877311	1.0862e+06	FALSE	0.000522878	0.00890434	1.10134	1.48177e+06	690632	TRUE	0.0450873	0.116441	0.565402	1.04706e+06	707566	FALSE	0.825612	0.875347	0.0349479	707566	690632	FALSE	0.0223118	0.151034	-0.500987	1.04706e+06	1.48177e+06	FALSE
Glutamine	1.01237e+06	962251	1.11297e+06	983365	929347	891418	891061	1.02273e+06	987495	1.1732e+06	1.06134e+06	972872	0.942684	0.94584	-0.00545038	998146	1.00192e+06	FALSE	1.00004e+06	0.485419	0.850119	0.0521766	1.01812e+06	981953	FALSE	0.157266	0.216241	0.138928	1.0292e+06	934710	FALSE	0.228222	0.318787	-0.144718	967095	1.06914e+06	FALSE	0.131822	0.313524	0.193858	1.06914e+06	934710	FALSE	0.354616	0.528919	-0.0897887	967095	1.0292e+06	FALSE
Glutathione	2681.27	7649.19	8600.28	1059.49	12373.8	34976	14659.9	4161.06	7000.52	8341.18	1903.25	2812.11	0.632055	0.699908	-0.457825	7458.71	10244.3	FALSE	8851.51	0.410618	0.850119	-0.792509	6479.68	11223.3	FALSE	0.429045	0.47195	-1.35455	6310.25	16136.4	FALSE	0.327221	0.412056	0.983801	8607.17	4352.18	FALSE	0.358519	0.525828	-1.89051	4352.18	16136.4	FALSE	0.569209	0.736624	0.447843	8607.17	6310.25	FALSE
Glutathione Disulfide	75571.9	95411.6	116094	40071.7	40500.8	34303.7	71321.6	113748	81431.7	42587.4	43309.9	30192.2	0.000728099	0.00394824	1.26111	92263.2	38494.3	TRUE	65378.8	0.86744	0.928428	-0.0712267	63765.2	66992.3	FALSE	0.0358834	0.0734359	1.32136	95692.6	38292.1	FALSE	0.0478006	0.116846	1.19891	88833.9	38696.5	FALSE	0.937163	0.947935	0.0151586	38696.5	38292.1	FALSE	0.712731	0.821638	-0.107298	88833.9	95692.6	FALSE
GMP	2245.36	2210.08	1544.81	858.694	672.721	985.461	1041.08	1474.49	1469.89	627.79	646.154	424.239	0.00276702	0.0093653	1.24431	1664.29	702.51	TRUE	1183.4	0.196175	0.850119	-0.583551	947.274	1419.52	FALSE	0.0240889	0.0572925	1.25339	2000.08	838.959	FALSE	0.0187065	0.0783893	1.23075	1328.49	566.061	FALSE	0.0808988	0.229648	-0.567642	566.061	838.959	FALSE	0.0789144	0.262545	-0.590277	1328.49	2000.08	FALSE
Guanine	243.226	715.442	759.332	357.208	169.875	471.749	61.1102	436.051	146.998	351.644	530.928	797.245	0.729728	0.783123	-0.1814	393.693	446.442	FALSE	420.067	0.666687	0.921608	-0.225331	387.329	452.805	FALSE	0.28899	0.339082	0.782416	572.667	332.944	FALSE	0.116553	0.193522	-1.38282	214.719	559.939	FALSE	0.229782	0.42491	0.74999	559.939	332.944	FALSE	0.157785	0.330596	-1.41524	214.719	572.667	FALSE
Guanosine	366.192	590.905	406.041	657.26	465.822	549.033	167.216	211.031	176.641	324.792	464.353	1025.12	0.0586556	0.090556	-0.862105	319.671	581.063	FALSE	450.367	0.462766	0.850119	-0.357447	394.858	505.875	FALSE	0.312904	0.357605	-0.294742	454.379	557.372	FALSE	0.188393	0.290852	-1.70911	184.963	604.754	FALSE	0.84805	0.888433	0.117708	604.754	557.372	FALSE	0.0554648	0.212213	-1.29666	184.963	454.379	FALSE
Histidine	586833	534313	630602	584084	564906	763622	526365	714217	620753	1.42662e+06	1.15211e+06	1.00882e+06	0.0736837	0.10973	-0.606245	602181	916694	FALSE	759437	0.0912681	0.730145	0.572401	908148	610727	FALSE	0.499254	0.535785	-0.126749	583916	637537	FALSE	0.0275704	0.0994775	-0.946662	620445	1.19585e+06	FALSE	0.0272349	0.188296	0.907456	1.19585e+06	637537	FALSE	0.59141	0.743486	0.0875433	620445	583916	FALSE
Homarine	4005.61	4692.04	4154.55	17269.4	5702.95	9290.38	10445	7123.45	8754.13	11086.4	18168.4	5603.65	0.102533	0.14553	-0.776844	6529.14	11186.9	FALSE	8858.01	0.357048	0.850119	0.439481	10196.9	7519.16	FALSE	0.198496	0.260711	-1.32785	4284.07	10754.3	FALSE	0.519849	0.586497	-0.405208	8774.21	11619.5	FALSE	0.87082	0.891072	0.111641	11619.5	10754.3	FALSE	0.0375268	0.163041	1.03429	8774.21	4284.07	FALSE
Homoserine	91732.8	111364	89676.2	32021.5	30409.9	19399.5	107480	115522	101972	35581.7	26944.9	18631.6	1.99894e-07	1.75907e-05	1.92224	102958	27164.9	TRUE	65061.3	0.834256	0.928428	0.116585	67688.7	62433.9	FALSE	0.00240971	0.0151467	1.83906	97590.8	27277	TRUE	0.000268258	0.0236067	2.00151	108325	27052.8	TRUE	0.973376	0.973376	-0.0119093	27052.8	27277	FALSE	0.265359	0.432437	0.150543	108325	97590.8	FALSE
Hydroxo B12	21514.9	18998.5	31154.7	7507.04	6863.05	8644.77	17297.7	13747.7	14954.4	12437.1	9801.45	10141.5	0.00850958	0.0208012	1.0869	19611.3	9232.48	TRUE	14421.9	0.538733	0.868857	-0.272623	13063.3	15780.5	FALSE	0.0459834	0.0860967	1.63877	23889.4	7671.62	FALSE	0.0291903	0.0994775	0.506523	15333.3	10793.3	FALSE	0.042208	0.204874	0.492538	10793.3	7671.62	FALSE	0.138766	0.313114	-0.639704	15333.3	23889.4	FALSE
Hypotaurine	122.176	162.939	215.899	605.465	649.093	608.625	99.8617	251.947	182.32	819.907	576.231	623.426	2.24941e-06	9.89741e-05	-1.90725	172.524	647.124	TRUE	409.824	0.843433	0.928428	0.111234	425.615	394.033	FALSE	0.000660818	0.00890434	-1.89485	167.005	621.061	TRUE	0.00858596	0.0592711	-1.91879	178.043	673.188	FALSE	0.559146	0.673847	0.116275	673.188	621.061	FALSE	0.843214	0.904912	0.0923343	178.043	167.005	FALSE
Isethionic Acid	3225.33	3120.57	3840.47	3230.44	2960.78	2694.33	2716.72	2730.98	2719.04	3968.48	3189.7	2981.34	0.668185	0.725929	-0.0518788	3058.85	3170.85	FALSE	3114.85	0.625389	0.921608	-0.0591116	3051.04	3178.65	FALSE	0.19593	0.260711	0.197107	3395.45	2961.85	FALSE	0.160011	0.256017	-0.31216	2722.24	3379.84	FALSE	0.304325	0.495422	0.190459	3379.84	2961.85	FALSE	0.0955175	0.269671	-0.318808	2722.24	3395.45	FALSE
Isoleucine	44698.4	49269.8	52018.1	60081.7	51217.6	64647.8	20726.5	26120.1	26583.6	89462.4	64855.6	79872.5	0.00251092	0.00916374	-0.902435	36569.4	68356.3	TRUE	52462.8	0.858622	0.928428	-0.0656097	51270.1	53655.6	FALSE	0.109943	0.16681	-0.269309	48662.1	58649	FALSE	0.0129319	0.0632228	-1.67324	24476.8	78063.5	FALSE	0.0949746	0.26118	0.41254	78063.5	58649	FALSE	0.00112526	0.0330077	-0.991386	24476.8	48662.1	TRUE
Ketoglutaric Acid	10055.3	10586.2	9995.01	14457.3	14892.5	14009.1	7615.5	9935.72	9117.74	55469.1	41094.7	47114.5	0.0376826	0.0625674	-1.70658	9550.9	31172.9	FALSE	20361.9	0.132264	0.850119	1.20297	28391.2	12332.5	FALSE	0.000297599	0.00890434	-0.501078	10212.1	14452.9	TRUE	0.00974758	0.0592711	-2.42961	8889.65	47892.8	FALSE	0.0149089	0.163998	1.72845	47892.8	14452.9	FALSE	0.184436	0.354561	-0.200086	8889.65	10212.1	FALSE
Kynurenine	267.378	217.859	303.585	1065.61	762.4	1054.65	252.503	322.104	253.499	3062.45	1865.23	2093.29	0.0111263	0.0238809	-2.6147	269.488	1650.61	TRUE	960.047	0.225472	0.850119	1.09616	1308.18	611.913	FALSE	0.0152007	0.0403933	-1.86963	262.941	960.885	TRUE	0.0297705	0.0994775	-3.08379	276.035	2340.33	FALSE	0.0555064	0.204874	1.28427	2340.33	960.885	FALSE	0.718933	0.821638	0.0701144	276.035	262.941	FALSE
Leucine	39998	51612.6	46661.4	68789.9	58067.7	98040.9	28471.2	35127.3	29892.1	96361.9	89490.6	72013.7	0.000657403	0.00394824	-1.05867	38627.1	80460.8	TRUE	59544	0.900481	0.929454	-0.0477105	58559.5	60528.4	FALSE	0.128111	0.19108	-0.701765	46090.7	74966.2	FALSE	0.0121939	0.0631215	-1.46373	31163.5	85955.4	FALSE	0.48421	0.635978	0.197349	85955.4	74966.2	FALSE	0.027324	0.163041	-0.564617	31163.5	46090.7	FALSE
Lysine	387394	344367	410163	334967	330295	373891	293182	449726	343552	361036	315076	290941	0.19152	0.251549	0.151528	371397	334368	FALSE	352883	0.463867	0.850119	-0.0869475	342252	363513	FALSE	0.229366	0.280336	0.136059	380642	346384	FALSE	0.492673	0.563055	0.167968	362153	322351	FALSE	0.3941	0.559368	-0.103742	322351	346384	FALSE	0.738866	0.823041	-0.0718327	362153	380642	FALSE
Malic Acid	25885.4	26438.8	29470.4	17033.8	14204.5	15734.6	14921.4	19709.8	19368	33894.1	26757.9	30998.8	0.911827	0.938168	-0.0297554	22632.3	23104	FALSE	22868.1	0.502343	0.850119	0.177739	24275	21461.2	FALSE	0.00159054	0.012303	0.800176	27264.9	15657.6	TRUE	0.010103	0.0592711	-0.763206	17999.8	30550.3	FALSE	0.0104427	0.157965	0.964318	30550.3	15657.6	FALSE	0.0104064	0.134125	-0.599064	17999.8	27264.9	FALSE
Methionine	63966.3	64375.1	72097.3	41037	33660.1	40327.5	64437.4	94383	75587.6	60899.1	49644.3	42700.6	0.00126715	0.00557544	0.696829	72474.5	44711.4	TRUE	58592.9	0.258354	0.850119	0.29729	64608.7	52577.2	FALSE	0.00137141	0.0121448	0.801218	66812.9	38341.6	TRUE	0.0699005	0.134294	0.613192	78136	51081.3	FALSE	0.123422	0.301697	0.413887	51081.3	38341.6	FALSE	0.3238	0.499902	0.225861	78136	66812.9	FALSE
Methionine Sulfoxide	3955.06	3463.43	5018.26	3989.82	3486.02	2516.96	4586.13	6477.31	5472.74	4471.8	3357.26	3151.6	0.032468	0.0549459	0.46614	4828.82	3495.58	FALSE	4162.2	0.202358	0.850119	0.294915	4586.14	3738.26	FALSE	0.266053	0.316388	0.315647	4145.58	3330.93	FALSE	0.0579949	0.118687	0.59066	5512.06	3660.22	FALSE	0.609989	0.71572	0.136004	3660.22	3330.93	FALSE	0.130069	0.30713	0.411017	5512.06	4145.58	FALSE
Methyl B12	149.011	293.685	191.885	47.7334	41.8106	44.0229	114.266	280.167	241.428	182.903	101.932	128.92	0.0101305	0.0223234	1.21487	211.74	91.2203	TRUE	151.48	0.386085	0.850119	0.450408	174.936	128.025	FALSE	0.0598832	0.101963	2.24824	211.527	44.5223	FALSE	0.27834	0.37112	0.619936	211.954	137.918	FALSE	0.0585249	0.204874	1.63122	137.918	44.5223	FALSE	0.995152	0.995152	0.00290964	211.954	211.527	FALSE
Methylthioadenosine	362136	381847	477075	731309	686672	870398	301695	490384	333769	1.24238e+06	1.01134e+06	972166	0.000807595	0.00394824	-1.23241	391151	919044	TRUE	655097	0.468361	0.850119	0.31035	725289	584906	FALSE	0.00882519	0.0273143	-0.906194	407019	762793	TRUE	0.00364702	0.0497075	-1.51868	375283	1.07529e+06	TRUE	0.0441834	0.204874	0.495369	1.07529e+06	762793	FALSE	0.670853	0.797771	-0.11712	375283	407019	FALSE
N-Acetyl-Lysine	27049.4	29260.1	26173.1	59480.8	55701.8	78671.9	15707.1	16912.9	15027.5	48256.3	70308.6	95574.2	0.000674421	0.00394824	-1.64859	21688.4	67998.9	TRUE	44843.6	0.886227	0.928428	-0.078039	43631.1	46056.2	FALSE	0.032971	0.0690821	-1.23281	27494.2	64618.2	FALSE	0.0554361	0.118687	-2.16808	15882.5	71379.7	FALSE	0.690406	0.774991	0.143573	71379.7	64618.2	FALSE	0.00112052	0.0330077	-0.79169	15882.5	27494.2	TRUE
NAD	4485.3	4202.67	5144.98	2080.31	1988.52	2314.37	2902.14	3383.3	2496.26	2800.37	2296.09	2328.32	0.0149518	0.0286035	0.711755	3769.11	2301.33	TRUE	3035.22	0.305457	0.850119	-0.318937	2701.08	3369.36	FALSE	0.00702343	0.0239825	1.11576	4610.98	2127.73	TRUE	0.223066	0.316609	0.242152	2927.23	2474.93	FALSE	0.157234	0.337478	0.218069	2474.93	2127.73	FALSE	0.0115013	0.134125	-0.655536	2927.23	4610.98	FALSE
NADP	2210.7	2185.97	2488.55	941.727	406.775	932.901	1382.1	1985.91	1089.18	774.417	1161.14	1094.89	0.00422864	0.0120039	1.09444	1890.4	885.308	TRUE	1387.85	0.498462	0.850119	-0.29188	1247.94	1527.77	FALSE	0.00418392	0.0193781	1.59358	2295.07	760.468	TRUE	0.206187	0.307534	0.556606	1485.73	1010.15	FALSE	0.315268	0.495422	0.409607	1010.15	760.468	FALSE	0.077945	0.262545	-0.627367	1485.73	2295.07	FALSE
Ornithine	95365.2	84860.7	111878	82159.3	88998.3	64704.9	66779.2	99024.9	79630.3	44656.3	42877.3	44782.4	0.024872	0.0437747	0.545961	89589.6	61363.1	TRUE	75476.4	0.0558135	0.491159	-0.483012	62958.4	87994.3	FALSE	0.154658	0.21603	0.308533	97367.8	78620.8	FALSE	0.0560078	0.118687	0.89135	81811.5	44105.3	FALSE	0.0403466	0.204874	-0.833959	44105.3	78620.8	FALSE	0.27435	0.43896	-0.251142	81811.5	97367.8	FALSE
PEP	217.525	477.612	169.315	1203.26	823.729	420.678	766.002	624.321	615.858	868.096	623.254	438.263	0.14007	0.189633	-0.608666	478.439	729.547	FALSE	603.993	0.566482	0.890186	0.248898	655.966	552.02	FALSE	0.130757	0.191777	-1.50155	288.151	815.89	FALSE	0.862495	0.881913	0.0561403	668.727	643.204	FALSE	0.549563	0.673847	-0.343098	643.204	815.89	FALSE	0.0389075	0.163041	1.21459	668.727	288.151	FALSE
Phenylacetic Acid	54.2652	59.6208	59.6858	42.3976	35.167	49.1519	38.2039	48.2145	40.3574	90.0705	62.9049	61.7915	0.462592	0.542774	-0.185182	50.0579	56.9139	FALSE	53.4859	0.460501	0.850119	0.185718	56.9238	50.048	FALSE	0.0439127	0.0840069	0.453929	57.8573	42.2388	FALSE	0.0746034	0.139148	-0.760493	42.2586	71.589	FALSE	0.0693742	0.210515	0.761168	71.589	42.2388	FALSE	0.0182897	0.134125	-0.453254	42.2586	57.8573	FALSE
Phenylalanine	754523	792939	768164	1.01223e+06	896853	1.13213e+06	532304	707996	590575	1.56387e+06	1.26922e+06	1.24048e+06	0.00208934	0.00835735	-0.778926	691083	1.1858e+06	TRUE	938441	0.639888	0.921608	0.140419	984074	892807	FALSE	0.0669472	0.107116	-0.393246	771875	1.01374e+06	FALSE	0.00795616	0.0592711	-1.15376	610292	1.35786e+06	FALSE	0.0586053	0.204874	0.421646	1.35786e+06	1.01374e+06	FALSE	0.0826545	0.262545	-0.338869	610292	771875	FALSE
Proline	6.5443e+06	7.65624e+06	7.63608e+06	3.69475e+06	3.4037e+06	4.41133e+06	1.44683e+07	1.88564e+07	1.53584e+07	1.29776e+07	9.52167e+06	9.58388e+06	0.123077	0.16923	0.693933	1.17533e+07	7.26548e+06	FALSE	9.50939e+06	0.00162444	0.0714756	1.27622	1.3461e+07	5.55773e+06	FALSE	0.0022215	0.0150379	0.923891	7.27887e+06	3.83659e+06	TRUE	0.0359104	0.0994775	0.601605	1.62277e+07	1.06944e+07	FALSE	0.0209133	0.184037	1.47896	1.06944e+07	3.83659e+06	FALSE	0.016208	0.134125	1.15667	1.62277e+07	7.27887e+06	FALSE
Pyridoxal	1803.5	1761.25	1982.72	1129.71	1358.39	1908.29	1256.67	2672.73	1698.32	2682.22	1723.4	1507.38	0.632539	0.699908	0.116342	1862.53	1718.23	FALSE	1790.38	0.376252	0.850119	0.214854	1923.45	1657.31	FALSE	0.233863	0.281917	0.335514	1849.16	1465.46	FALSE	0.871891	0.881913	-0.0713396	1875.91	1971	FALSE	0.314073	0.495422	0.427571	1971	1465.46	FALSE	0.95516	0.988872	0.0207181	1875.91	1849.16	FALSE
Pyridoxal Phosphate	64916.2	52246.1	52261.7	41894.7	34786	49084.1	34784.7	53669	40703.6	55473.2	56796.1	43039.8	0.611529	0.699908	0.0871744	49763.5	46845.6	FALSE	48304.6	0.756509	0.928428	-0.0533801	47411.1	49198.1	FALSE	0.0693384	0.10896	0.42991	56474.7	41921.6	FALSE	0.289846	0.375095	-0.266013	43052.4	51769.7	FALSE	0.177431	0.354863	0.304413	51769.7	41921.6	FALSE	0.132624	0.30713	-0.391509	43052.4	56474.7	FALSE
Sarcosine	1513.48	2049.87	1447.26	2554.47	1497.48	1762.34	2004.74	3260.5	2945.31	2944.17	1931.97	2373.18	0.94584	0.94584	0.0172937	2203.53	2177.27	FALSE	2190.4	0.0233513	0.342486	0.514174	2576.64	1804.15	FALSE	0.51776	0.54895	-0.214619	1670.2	1938.1	FALSE	0.541175	0.602828	0.179633	2736.85	2416.44	FALSE	0.330702	0.501754	0.318241	2416.44	1938.1	FALSE	0.087037	0.264112	0.712493	2736.85	1670.2	FALSE
Serine	18137.8	17006.5	17924.7	11476.9	11351.4	10122.9	13027.2	17548.4	12537.8	15211.8	11725.1	11363.7	0.00945856	0.0223234	0.432848	16030.4	11875.3	TRUE	13952.8	0.680733	0.921608	-0.0794009	13569	14336.7	FALSE	0.000345583	0.00890434	0.687538	17689.7	10983.7	TRUE	0.472674	0.554604	0.170773	14371.1	12766.8	FALSE	0.280957	0.469188	0.217031	12766.8	10983.7	FALSE	0.167946	0.335893	-0.299733	14371.1	17689.7	FALSE
Sucrose	108.253	224.956	143.057	220.484	75.9854	160.161	176.478	216.496	49.4247	455.987	144.191	298.563	0.275245	0.341149	-0.561078	153.111	225.895	FALSE	189.503	0.311986	0.850119	0.523672	223.524	155.483	FALSE	0.910128	0.92059	0.060739	158.755	152.21	FALSE	0.232787	0.320082	-1.02256	147.466	299.581	FALSE	0.239682	0.42491	0.976879	299.581	152.21	FALSE	0.863498	0.915516	-0.106417	147.466	158.755	FALSE
Sulfolactic acid	831.397	468.757	1088.83	1078.61	792.983	1397.23	279.188	561.964	513.132	1645.04	1542.52	1363.75	0.00305511	0.0099574	-1.06289	623.878	1303.35	TRUE	963.616	0.885203	0.928428	0.0618364	984.264	942.968	FALSE	0.306912	0.355372	-0.452378	796.327	1089.61	FALSE	0.000899354	0.0395716	-1.74875	451.428	1517.1	TRUE	0.118291	0.301697	0.477506	1517.1	1089.61	FALSE	0.186337	0.354561	-0.818865	451.428	796.327	FALSE
Taurine	3319.12	4755.74	3556.81	11390.3	10806.8	11009.4	3073.46	4292.51	3837.62	13349.5	10736.9	7878.69	6.93727e-05	0.00101747	-1.51298	3805.88	10861.9	TRUE	7333.91	0.90833	0.929454	-0.0547419	7194.79	7473.03	FALSE	0.00138009	0.0121448	-1.51341	3877.22	11068.8	TRUE	0.042593	0.113581	-1.51254	3734.53	10655	FALSE	0.818416	0.875347	-0.0549676	10655	11068.8	FALSE	0.815012	0.885445	-0.0540978	3734.53	3877.22	FALSE
Thiamine monophosphate	343.401	245.191	193.658	541.702	250.425	425.264	110.946	190.898	138.06	363.79	353.963	307.315	0.010147	0.0223234	-0.875657	203.692	373.743	TRUE	288.718	0.234475	0.850119	-0.448867	244.162	333.273	FALSE	0.22548	0.279468	-0.638091	260.75	405.797	FALSE	0.00347628	0.0497075	-1.22046	146.635	341.69	TRUE	0.530195	0.66653	-0.248071	341.69	405.797	FALSE	0.104191	0.269671	-0.830441	146.635	260.75	FALSE
Thiamine pyrophosphate	8762.32	17626.5	19024.1	3219.52	8410.68	11166.2	14443	6878.93	14800.1	11304.3	7035.84	10361.1	0.0630077	0.0955979	0.662912	13589.2	8582.94	FALSE	11086.1	0.84654	0.928428	-0.073456	10803.9	11368.2	FALSE	0.137171	0.195848	0.994293	15137.6	7598.81	FALSE	0.455912	0.543462	0.331769	12040.7	9567.08	FALSE	0.511726	0.652636	0.332304	9567.08	7598.81	FALSE	0.496109	0.661479	-0.33022	12040.7	15137.6	FALSE
Threonine	41082.3	36513.2	45544.3	36531.8	32988.1	39265.3	38606.4	44704.8	37200.9	54666	42407.4	31995	0.803515	0.841778	0.034747	40608.6	39642.3	FALSE	40125.5	0.442086	0.850119	0.105847	41596.8	38654.2	FALSE	0.214868	0.27012	0.178814	41046.6	36261.7	FALSE	0.714059	0.766307	-0.0989585	40170.7	43022.8	FALSE	0.412671	0.576429	0.246654	43022.8	36261.7	FALSE	0.813792	0.885445	-0.0311186	40170.7	41046.6	FALSE
Tocopherol (Vit E)	399.463	225.816	133.015	164.046	224.631	355.913	402.919	302.032	345.562	512.219	161.907	166.701	0.619361	0.699908	0.190177	301.468	264.236	FALSE	282.852	0.381236	0.850119	0.331675	315.223	250.481	FALSE	0.964704	0.964704	0.0263126	252.765	248.197	FALSE	0.612185	0.66509	0.321213	350.171	280.276	FALSE	0.820254	0.875347	0.175363	280.276	248.197	FALSE	0.340276	0.516281	0.470263	350.171	252.765	FALSE
trans Hydroxy L proline	39210.1	43500.9	43591.7	33158.7	33297.2	40140.9	95227.9	121826	101067	120246	87991.1	86452.2	0.73881	0.783317	0.147304	74070.5	66880.9	FALSE	70475.7	8.38216e-05	0.0073763	1.39573	102135	38816.6	TRUE	0.0853641	0.13179	0.244721	42100.9	35532.3	FALSE	0.600604	0.660664	0.11038	106040	98229.6	FALSE	0.0254196	0.188296	1.46703	98229.6	35532.3	FALSE	0.0133998	0.134125	1.33269	106040	42100.9	FALSE
Trigonelline	2850.03	3131.31	3134.72	3467.67	2567.49	2662.63	3673.86	3308.8	2829.08	7757.54	7030.5	2315.93	0.30377	0.366189	-0.446963	3154.63	4300.29	FALSE	3727.46	0.169934	0.850119	0.595448	4485.95	2968.98	FALSE	0.68116	0.703905	0.0677626	3038.69	2899.26	FALSE	0.289191	0.375095	-0.801752	3270.58	5701.32	FALSE	0.240062	0.42491	0.975611	5701.32	2899.26	FALSE	0.451009	0.629981	0.106096	3270.58	3038.69	FALSE
Tryptophan	450541	433086	463630	1.16778e+06	1.0044e+06	1.22476e+06	311926	397753	400169	2.03372e+06	1.55459e+06	1.56928e+06	0.00100212	0.0046414	-1.79973	409518	1.42576e+06	TRUE	917637	0.486941	0.850119	0.401708	1.04457e+06	790701	FALSE	0.00831216	0.0270915	-1.33422	449086	1.13232e+06	TRUE	0.0112577	0.0619172	-2.21633	369949	1.7192e+06	FALSE	0.0488745	0.204874	0.602456	1.7192e+06	1.13232e+06	FALSE	0.101752	0.269671	-0.279662	369949	449086	FALSE
Tyrosine	31360.7	33970.5	28967.9	117313	136734	212596	12190.7	13940.5	16841	263204	160766	160723	0.000789199	0.00394824	-2.93712	22878.6	175223	TRUE	99050.6	0.838318	0.928428	0.162144	104611	93490.3	FALSE	0.0503969	0.0905087	-2.307	31433	155548	FALSE	0.0337839	0.0994775	-3.7662	14324.1	194898	FALSE	0.430997	0.59262	0.325361	194898	155548	FALSE	0.00100678	0.0330077	-1.13384	14324.1	31433	TRUE
UDP-glucosamine	996.243	961.903	1067.21	479.152	536.209	506.932	553.729	1001.56	723.926	1067.58	721.065	650.973	0.0953384	0.137537	0.421039	884.096	660.319	FALSE	772.207	0.843222	0.928428	0.0533097	786.473	757.942	FALSE	0.000688219	0.00890434	0.990859	1008.45	507.431	TRUE	0.785088	0.812797	-0.0981183	759.739	813.207	FALSE	0.138703	0.321207	0.68041	813.207	507.431	FALSE	0.191914	0.354561	-0.408567	759.739	1008.45	FALSE
UDP-glucose	11073.6	10949	7839.82	887.846	3765.49	2860.44	6348.29	7688.05	6503.57	2970.3	3873	2244.85	0.000508012	0.00394824	1.60214	8400.38	2766.99	TRUE	5583.69	0.535543	0.868857	-0.335155	4938.01	6229.36	FALSE	0.00611268	0.0233877	1.99072	9954.13	2504.59	TRUE	0.00395401	0.0497075	1.17637	6846.64	3029.38	TRUE	0.62517	0.723881	0.274447	3029.38	2504.59	FALSE	0.0835371	0.262545	-0.539901	6846.64	9954.13	FALSE
Uridine	750.335	723.91	612.477	1165.08	755.934	1288.48	306.907	716.856	586.063	2071.61	1193.59	1136.72	0.0123824	0.0248452	-1.04199	616.091	1268.57	TRUE	942.33	0.680688	0.921608	0.182822	1001.96	882.703	FALSE	0.137984	0.195848	-0.621107	695.574	1069.83	FALSE	0.0758991	0.139148	-1.45123	536.608	1467.31	FALSE	0.328893	0.501754	0.455787	1467.31	1069.83	FALSE	0.318947	0.499902	-0.374334	536.608	695.574	FALSE
Valine	38447	39621	42916.2	30842.7	26333.5	34866.8	38363.8	44718.2	37982.2	63347.2	46405.2	43910.6	0.916846	0.938168	-0.0216374	40341.4	40951	FALSE	40646.2	0.0505577	0.491159	0.366962	45787.9	35504.5	FALSE	0.039512	0.079024	0.394439	40328.1	30681	FALSE	0.210106	0.308156	-0.343997	40354.7	51221	FALSE	0.0624197	0.204874	0.73939	51221	30681	FALSE	0.992286	0.995152	0.000954088	40354.7	40328.1	FALSE
Vitamin B2	1035.99	1018.56	1199.67	2405.96	1301.73	3478.31	1076.83	1027.68	1079.29	3809.46	3076.34	1879.67	0.0100877	0.0223234	-1.309	1073	2658.58	TRUE	1865.79	0.700163	0.928428	0.194769	1991.54	1740.04	FALSE	0.171294	0.231905	-1.14288	1084.74	2395.33	FALSE	0.0803658	0.14433	-1.46108	1061.27	2921.82	FALSE	0.566644	0.673847	0.286641	2921.82	2395.33	FALSE	0.728837	0.822278	-0.0315614	1061.27	1084.74	FALSE
Vitamin B3	106777	113474	99767.2	116840	99923.3	151400	62061.1	106754	76946.1	126422	138048	135608	0.0124226	0.0248452	-0.441319	94296.5	128040	TRUE	111168	0.65462	0.921608	-0.0916152	107640	114697	FALSE	0.401918	0.447707	-0.202192	106673	122721	FALSE	0.0511434	0.118687	-0.703023	81920.4	133359	FALSE	0.558546	0.673847	0.119933	133359	122721	FALSE	0.193397	0.354561	-0.380897	81920.4	106673	FALSE
Xanthine	22840.4	19561.7	14437.7	22620.3	17909.1	31033.5	13780.5	16385.8	19801.6	42899.1	35594.8	32598.9	0.0165862	0.0310549	-0.774111	17801.3	30442.6	TRUE	24122	0.341687	0.850119	0.326929	26843.5	21400.5	FALSE	0.351496	0.396559	-0.332311	18946.6	23854.3	FALSE	0.00875954	0.0592711	-1.15269	16656	37030.9	FALSE	0.057875	0.204874	0.634481	37030.9	23854.3	FALSE	0.492297	0.661479	-0.185899	16656	18946.6	FALSE

## Sheet: Table S4
Compound Name	Field samples	Culture samples		green = detected
Aconitic Acid	detected	detected		red = not detected
Adenosyl Homocysteine	detected	detected
Adenosyl Methionine	detected	detected
Alanine	detected	detected
Aminobutyric Acid	detected	detected
AMP	detected	detected
Arginine	detected	detected
Argininosuccinic Acid	detected	detected
Asparagine	detected	detected
Aspartic acid	detected	detected
Betaine	detected	detected
Carnitine	detected	detected
Carotene	detected	detected
Choline	detected	detected
Citric Acid	detected	detected
Citrulline	detected	detected
Coenzyme B12	detected	detected
Cysteic Acid	detected	detected
Cystine	detected	detected
DHPS	detected	detected
Dimethyl Glycine	detected	detected
DMSP	detected	detected
FAD	detected	detected
Fructose 6 phosphate	detected	detected
Fumaric Acid	detected	detected
Glucose 6 phosphate	detected	detected
Glucosylglycerol	detected	detected
Glutamic acid	detected	detected
Glutamine	detected	detected
Glutathione	detected	detected
Glutathione Disulfide	detected	detected
GMP	detected	detected
Guanine	detected	detected
Guanine	detected	detected
Histidine	detected	detected
Homarine	detected	detected
Homoserine	detected	detected
Hydroxo B12	detected	detected
Hypotaurine	detected	detected
Isethionic Acid	detected	detected
Isoleucine	detected	detected
Ketoglutaric Acid	detected	detected
Kynurenine	detected	detected
Leucine	detected	detected
Lysine	detected	detected
Malic Acid	detected	detected
Methionine	detected	detected
Methionine Sulfoxide	detected	detected
Methyl B12	detected	detected
Methylthioadenosine	detected	detected
N-Acetyl-Lysine	detected	detected
Ornithine	detected	detected
Phenylalanine	detected	detected
Proline	detected	detected
Pyridoxal Phosphate	detected	detected
Sarcosine	detected	detected
Serine	detected	detected
Sucrose	detected	detected
Sulfolactic acid	detected	detected
Taurine	detected	detected
Thiamine monophosphate	detected	detected
thiamine pyrophosphate	detected	detected
Threonine	detected	detected
trans Hydroxy L proline	detected	detected
Trigonelline	detected	detected
Tryptophan	detected	detected
Tyrosine	detected	detected
UDP-glucosamine	detected	detected
UDP-glucose	detected	detected
Uridine	detected	detected
Valine	detected	detected
Vitamin B2	detected	detected
Vitamin B3	detected	detected
Xanthine	detected	detected
Adenine	not detected	detected
ADP	not detected	detected
Aminobenzoic Acid	not detected	detected
Cyano B12	not detected	detected
NAD	not detected	detected
NADP	not detected	detected
PEP	not detected	detected
Phenylacetic Acid	not detected	detected
Pyridoxal	not detected	detected
Tocopherol (Vit E)	not detected	detected
4-hydroxybenzaldehyde	detected	not detected
Abscisic Acid	detected	not detected
Adenosine	detected	not detected
cGMP	detected	not detected
Chitobiose	detected	not detected
Creatine	detected	not detected
Cys-Gly oxidized	detected	not detected
Cystathionine	detected	not detected
Cytidine	detected	not detected
Gluconic Acid	detected	not detected
Glucose 1 phosphate	detected	not detected
glycerol 3 phosphate	detected	not detected
Hydroxyectoine	detected	not detected
IAA	detected	not detected
Indole 3 acetamide	detected	not detected
Indole 3 methyl acetate	detected	not detected
Methyl 3-methylthiopropionate	detected	not detected
N-methyltaurine	detected	not detected
Picolinic Acid	detected	not detected
Riboflavin Monophosphate	detected	not detected
Ribose 5 phosphate	detected	not detected
Shikimic Acid	detected	not detected
Stachydrine hydrochloride (proline betaine)	detected	not detected
Succinic Acid	detected	not detected
Sulfurol	detected	not detected
Thymine	detected	not detected
Trehalose	detected	not detected
Tryptamine	detected	not detected
Vitamin B1	detected	not detected
Vitamin B5	detected	not detected
Total detected	104	84
Total unique	30	10
Total shared	74

## Sheet: Table S5
Two-way ANOVA no fdr													Tukey's HSD
Compound name	Interaction effect F statistic (1, 8)	Interaction effect p value	Significant interaction	Temperature effect F statistic (1, 8)	Temperature effect p value	Significant temperature effect	Higher in:	Salinity effect F statistic (1, 8)	Salinity effect p value	Significant salinity effect	Higher in:		Specific significant pair comparisons (Tukey HSD)	p value	Significance	Higher in:	Specific significant pair comparisons (Tukey HSD)	p value	Significance	Higher in:	Specific significant pair comparisons (Tukey HSD)	p value	Significance	Higher in:	Specific significant pair comparisons (Tukey HSD)	p value	Significance	Higher in:
DHPS	10.274	0.01251	TRUE	NA	NA	NA	NA	NA	NA	NA	NA		32 ppt 4C vs 32 ppt -1C	0.0021321	TRUE	32 ppt -1C	32 ppt 4C vs 41 ppt -1C	0.0047964	TRUE	41 ppt -1C	41 ppt 4C vs 32 ppt 4C	0.0205059	TRUE	41 ppt 4C
DMSP	11.22	0.01009	TRUE	NA	NA	NA	NA	NA	NA	NA	NA		32 ppt 4C vs 32 ppt -1C	0.0059089	TRUE	32 ppt -1C	32 ppt 4C vs 41 ppt -1C	0.0028913	TRUE	41 ppt -1C	41 ppt 4C vs 32 ppt 4C	0.0031171	TRUE	41 ppt 4C
GBT	11.918	0.00867	TRUE	NA	NA	NA	NA	NA	NA	NA	NA		41 ppt 4C vs 32 ppt 4C	0.0008735	TRUE	41 ppt 4C	41 ppt 4C vs 41 ppt -1C	0.0470573	TRUE	41 ppt 4C	32 ppt 4C vs 41 ppt -1C	0.0479943	TRUE	41 ppt -1C	41 ppt 4C vs 32 ppt -1C	0.0056274	TRUE	41 ppt 4C
Proline	1.316	0.28441	FALSE	24.253	0.00116	TRUE	-1C	75.217	2.43e-05	TRUE	41 ppt		NA	NA	NA	NA	NA	NA	NA	NA	NA	NA	NA	NA

## Sheet: Table S6
Nitrogen-containing compatible solute	Sea ice bottom measured concentration (mmol CS / mol C)	Nitrogen atoms in CS	mmol N / mol C	85% dump of N-containing CS	Sea ice bottom measured mol C / L (M)	CS-derived mol N / L estimate (mM)	Sea ice bottom measured [NO3-2] (mM)
Proline	0.18	1	0.18
Glycine betaine	0.23	1	0.23
Homarine	0.264	1	0.264
Total			0.674	0.5729	0.001715	0.000982524	0.0101891
